# Supplementary material for: Pattern of sensitivity of progressive cutaneous squamous cell carcinoma cells to UVB and oxidative stress-induced cell death
Source: Royal Society of Chemistry journal article supplement (doi:10.1039/c2pp25064k), 2012-01-01
Supplement: c2pp25064k.pdf [file c2pp25064k.pdf]

## Supplementary figure

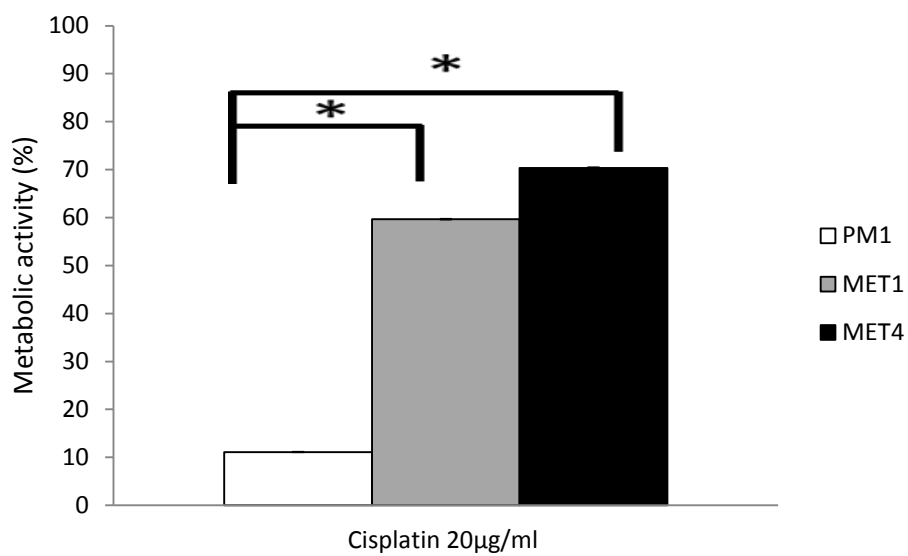

Supplementary figure:

PM1, MET1 and MET4 cells were treated with 20µg/ml cisplatin for 24h. Metabolic activity was measured after 24h by MTT assay. A representative graph of at least 3 experiments is shown. The metabolic activity was expressed relatively to the untreated controls. Columns, mean of an experiment performed in triplicate, bars denote standard deviation; \* p<0,05.
